# Supplementary material for: Atomically precise edge chlorination of nanographenes and its application in graphene nanoribbons
Source: Springer Nature journal article supplement (doi:10.1038/ncomms3646), 2013-11-11
Supplement: 41467_2013_BFncomms3646_MOESM1_ESM.mol [file 41467_2013_BFncomms3646_MOESM1_ESM.mol]

  ChemDraw10221311052D

 60 72  0  0  0  0  0  0  0  0999 V2000
   -0.7145    2.8875    0.0000 C   0  0  0  0  0  0  0  0  0  0  0  0
   -0.7145    2.0625    0.0000 C   0  0  0  0  0  0  0  0  0  0  0  0
    0.0000    1.6500    0.0000 C   0  0  0  0  0  0  0  0  0  0  0  0
    0.7145    2.0625    0.0000 C   0  0  0  0  0  0  0  0  0  0  0  0
    0.7145    2.8875    0.0000 C   0  0  0  0  0  0  0  0  0  0  0  0
   -0.0000    3.3000    0.0000 C   0  0  0  0  0  0  0  0  0  0  0  0
   -0.7145    0.4125    0.0000 C   0  0  0  0  0  0  0  0  0  0  0  0
   -0.7145   -0.4125    0.0000 C   0  0  0  0  0  0  0  0  0  0  0  0
    0.0000   -0.8250    0.0000 C   0  0  0  0  0  0  0  0  0  0  0  0
    0.7145   -0.4125    0.0000 C   0  0  0  0  0  0  0  0  0  0  0  0
    0.7145    0.4125    0.0000 C   0  0  0  0  0  0  0  0  0  0  0  0
    0.0000    0.8250    0.0000 C   0  0  0  0  0  0  0  0  0  0  0  0
   -0.7145   -2.0625    0.0000 C   0  0  0  0  0  0  0  0  0  0  0  0
   -0.7145   -2.8875    0.0000 C   0  0  0  0  0  0  0  0  0  0  0  0
    0.0000   -3.3000    0.0000 C   0  0  0  0  0  0  0  0  0  0  0  0
    0.7145   -2.8875    0.0000 C   0  0  0  0  0  0  0  0  0  0  0  0
    0.7145   -2.0625    0.0000 C   0  0  0  0  0  0  0  0  0  0  0  0
    0.0000   -1.6500    0.0000 C   0  0  0  0  0  0  0  0  0  0  0  0
    1.4289   -0.8250    0.0000 C   0  0  0  0  0  0  0  0  0  0  0  0
    1.4290   -1.6500    0.0000 C   0  0  0  0  0  0  0  0  0  0  0  0
    2.1434   -2.0625    0.0000 C   0  0  0  0  0  0  0  0  0  0  0  0
    2.8579   -1.6500    0.0000 C   0  0  0  0  0  0  0  0  0  0  0  0
    2.8579   -0.8250    0.0000 C   0  0  0  0  0  0  0  0  0  0  0  0
    2.1434   -0.4125    0.0000 C   0  0  0  0  0  0  0  0  0  0  0  0
    1.4289    1.6500    0.0000 C   0  0  0  0  0  0  0  0  0  0  0  0
    1.4289    0.8250    0.0000 C   0  0  0  0  0  0  0  0  0  0  0  0
    2.1434    0.4125    0.0000 C   0  0  0  0  0  0  0  0  0  0  0  0
    2.8579    0.8250    0.0000 C   0  0  0  0  0  0  0  0  0  0  0  0
    2.8579    1.6500    0.0000 C   0  0  0  0  0  0  0  0  0  0  0  0
    2.1434    2.0625    0.0000 C   0  0  0  0  0  0  0  0  0  0  0  0
   -2.8579    1.6500    0.0000 C   0  0  0  0  0  0  0  0  0  0  0  0
   -2.8579    0.8250    0.0000 C   0  0  0  0  0  0  0  0  0  0  0  0
   -2.1434    0.4125    0.0000 C   0  0  0  0  0  0  0  0  0  0  0  0
   -1.4289    0.8250    0.0000 C   0  0  0  0  0  0  0  0  0  0  0  0
   -1.4289    1.6500    0.0000 C   0  0  0  0  0  0  0  0  0  0  0  0
   -2.1434    2.0625    0.0000 C   0  0  0  0  0  0  0  0  0  0  0  0
   -2.8579   -0.8250    0.0000 C   0  0  0  0  0  0  0  0  0  0  0  0
   -2.8579   -1.6500    0.0000 C   0  0  0  0  0  0  0  0  0  0  0  0
   -2.1434   -2.0625    0.0000 C   0  0  0  0  0  0  0  0  0  0  0  0
   -1.4289   -1.6500    0.0000 C   0  0  0  0  0  0  0  0  0  0  0  0
   -1.4289   -0.8250    0.0000 C   0  0  0  0  0  0  0  0  0  0  0  0
   -2.1434   -0.4125    0.0000 C   0  0  0  0  0  0  0  0  0  0  0  0
   -2.1434    2.8875    0.0000 Cl  0  0  0  0  0  0  0  0  0  0  0  0
   -1.4289    3.3000    0.0000 Cl  0  0  0  0  0  0  0  0  0  0  0  0
   -0.0000    4.1250    0.0000 Cl  0  0  0  0  0  0  0  0  0  0  0  0
    1.4289    3.3000    0.0000 Cl  0  0  0  0  0  0  0  0  0  0  0  0
    2.1434    2.8875    0.0000 Cl  0  0  0  0  0  0  0  0  0  0  0  0
    3.5723    2.0625    0.0000 Cl  0  0  0  0  0  0  0  0  0  0  0  0
    3.5724    0.4125    0.0000 Cl  0  0  0  0  0  0  0  0  0  0  0  0
    3.5723   -0.4125    0.0000 Cl  0  0  0  0  0  0  0  0  0  0  0  0
    3.5724   -2.0625    0.0000 Cl  0  0  0  0  0  0  0  0  0  0  0  0
    2.1434   -2.8875    0.0000 Cl  0  0  0  0  0  0  0  0  0  0  0  0
    1.4290   -3.3000    0.0000 Cl  0  0  0  0  0  0  0  0  0  0  0  0
    0.0000   -4.1250    0.0000 Cl  0  0  0  0  0  0  0  0  0  0  0  0
   -1.4289   -3.3000    0.0000 Cl  0  0  0  0  0  0  0  0  0  0  0  0
   -2.1434   -2.8875    0.0000 Cl  0  0  0  0  0  0  0  0  0  0  0  0
   -3.5723   -2.0625    0.0000 Cl  0  0  0  0  0  0  0  0  0  0  0  0
   -3.5723   -0.4125    0.0000 Cl  0  0  0  0  0  0  0  0  0  0  0  0
   -3.5723    0.4125    0.0000 Cl  0  0  0  0  0  0  0  0  0  0  0  0
   -3.5724    2.0625    0.0000 Cl  0  0  0  0  0  0  0  0  0  0  0  0
  1  2  2  0      
  2  3  1  0      
  3  4  2  0      
  4  5  1  0      
  5  6  2  0      
  6  1  1  0      
  7  8  2  0      
  8  9  1  0      
  9 10  2  0      
 10 11  1  0      
 11 12  2  0      
 12  7  1  0      
 13 14  2  0      
 14 15  1  0      
 15 16  2  0      
 16 17  1  0      
 17 18  2  0      
 18 13  1  0      
 19 20  2  0      
 20 21  1  0      
 21 22  2  0      
 22 23  1  0      
 23 24  2  0      
 24 19  1  0      
 25 26  2  0      
 26 27  1  0      
 27 28  2  0      
 28 29  1  0      
 29 30  2  0      
 30 25  1  0      
 31 32  2  0      
 32 33  1  0      
 33 34  2  0      
 34 35  1  0      
 35 36  2  0      
 36 31  1  0      
 37 38  2  0      
 38 39  1  0      
 39 40  2  0      
 40 41  1  0      
 41 42  2  0      
 42 37  1  0      
 35  2  1  0      
 34  7  1  0      
  3 12  1  0      
  4 25  1  0      
 26 11  1  0      
 33 42  1  0      
 41  8  1  0      
 40 13  1  0      
  9 18  1  0      
 17 20  1  0      
 10 19  1  0      
 27 24  1  0      
 36 43  1  0      
  1 44  1  0      
  6 45  1  0      
  5 46  1  0      
 30 47  1  0      
 29 48  1  0      
 28 49  1  0      
 23 50  1  0      
 22 51  1  0      
 21 52  1  0      
 16 53  1  0      
 15 54  1  0      
 14 55  1  0      
 39 56  1  0      
 38 57  1  0      
 37 58  1  0      
 32 59  1  0      
 31 60  1  0      
M  END
